# Supplementary material for: Differences in Life History Traits in Rural vs. Urban Populations of a Specialist Ground Beetle, Carabus convexus
Source: MDPI journal article supplement (doi:10.3390/insects12060540), 2021-06-10
Supplement: s1 [file s1]

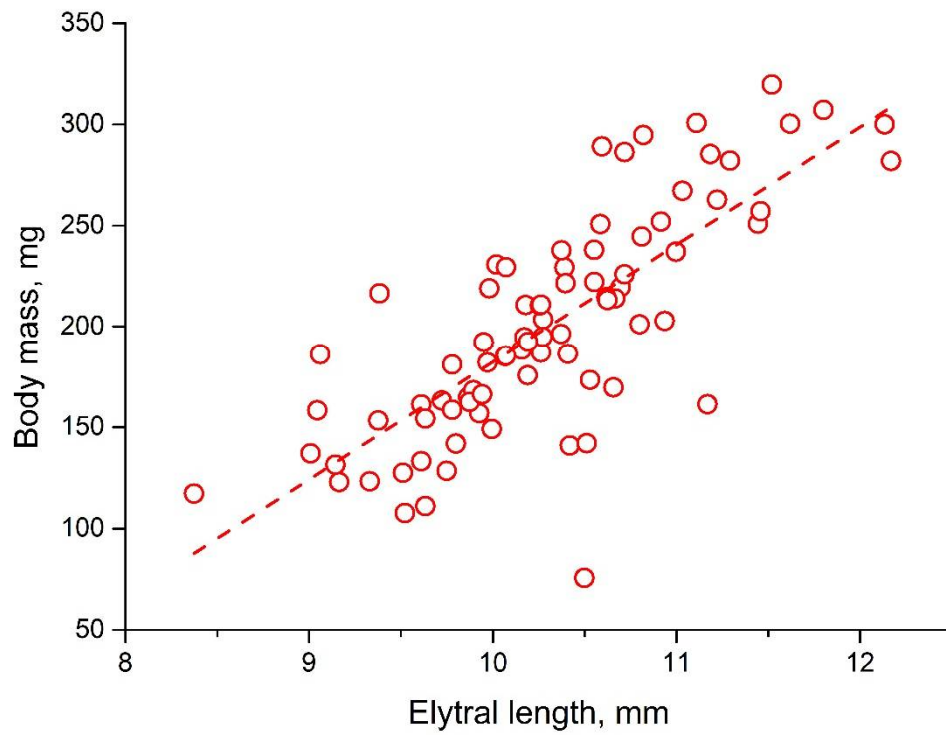

**Figure S1.** Relationship between the elytral length (as a proxy for body length) and the body mass of *C. convexus* individuals sampled in rural and urban habitats. The slope of the fitted line is significantly different from zero (adjusted  $R^2 = 0.5912$ ;  $F_{1,80} = 118.1375$ ,  $p < 0.001$ ). Equation of the fitted line:  $Body\ mass = -0.3994 + 0.0582 \times Elytral\ length$
